# Supplementary material for: Synthesis and Characterization of a “Clickable” PBR28 TSPO-Selective Ligand Derivative Suitable for the Functionalization of Biodegradable Polymer Nanoparticles
Source: MDPI journal article supplement (doi:10.3390/nano11071693), 2021-06-28
Supplement: s1 [file s1]

## Article

# Synthesis and Characterization of a “Clickable” PBR28 TSPO-Selective Ligand Derivative Suitable for the Functionalization of Biodegradable Polymer Nanoparticles

Renato Auriemma <sup>1,†</sup>, Mattia Sponchioni <sup>1,\*</sup>, Umberto Capasso Palmiero <sup>2</sup>, Giacomo Rossino <sup>3</sup>, Arianna Rossetti <sup>1</sup>, Andrea Marsala <sup>4</sup>, Simona Collina <sup>3</sup>, Alessandro Sacchetti <sup>1</sup>, Davide Moscatelli <sup>1,†</sup> and Marco Peviani <sup>4,5,6,\*</sup>

<sup>1</sup> Department of Chemistry, Materials and Chemical Engineering “Giulio Natta”, Politecnico di Milano, Via Mancinelli 7, 20131 Milano, Italy; renato.auriemma@polimi.it (R.A.); arianna.rossetti@polimi.it (A.R.); alessandro.sacchetti@polimi.it (A.S.); davide.moscatelli@polimi.it (D.M.)

<sup>2</sup> Department of Chemistry and Applied Biosciences, ETH Zürich, Vladimir-Prelog-Weg 1-5/10, 8093 Zürich, Switzerland; umberto.capasso@chem.ethz.ch

<sup>3</sup> Department of Drug Sciences, University of Pavia, Via Taramelli 12, 27100 Pavia, Italy; giacomo.rossino01@universitadipavia.it (G.R.); simona.collina@unipv.it (S.C.)

<sup>4</sup> Department of Biology and Biotechnology “L. Spallanzani”, University of Pavia, Via Ferrata 9, 27100 Pavia, Italy; andrea.marsala01@universitadipavia.it (A.M.)

<sup>5</sup> Gene Therapy Program, Dana Farber/Boston Children’s Cancer and Blood Disorders Center, 450 Brookline Ave., Boston, MA 02215, USA

<sup>6</sup> Harvard Medical School, Boston, MA 02115, USA

\* Correspondence: mattia.sponchioni@polimi.it (M.S.); marco.peviani@unipv.it (M.P.)

† These authors contribute equally to this work.

**Citation:** Auriemma, R.; Sponchioni, M.; Capasso Palmiero, U.; Rossino, G.; Rossetti, A.; Marsala, A.; Collina, S.; Sacchetti, A.; Moscatelli, D.; Peviani, M. Synthesis and Characterization of a “Clickable” PBR28 TSPO-Selective Ligand Derivative Suitable for the Functionalization of Biodegradable Polymer Nanoparticles. *Nanomaterials* **2021**, *11*, x. <https://doi.org/10.3390/xxxxx>

Academic Editor(s): Pablo Botella;  
Christopher C. Landry; Suming Li

Received: 9 April 2021

Accepted: 22 June 2021

Published: date

**Publisher’s Note:** MDPI stays neutral with regard to jurisdictional claims in published maps and institutional affiliations.

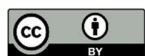

**Copyright:** © 2021 by the authors. Submitted for possible open access publication under the terms and conditions of the Creative Commons Attribution (CC BY) license (<http://creativecommons.org/licenses/by/4.0/>).

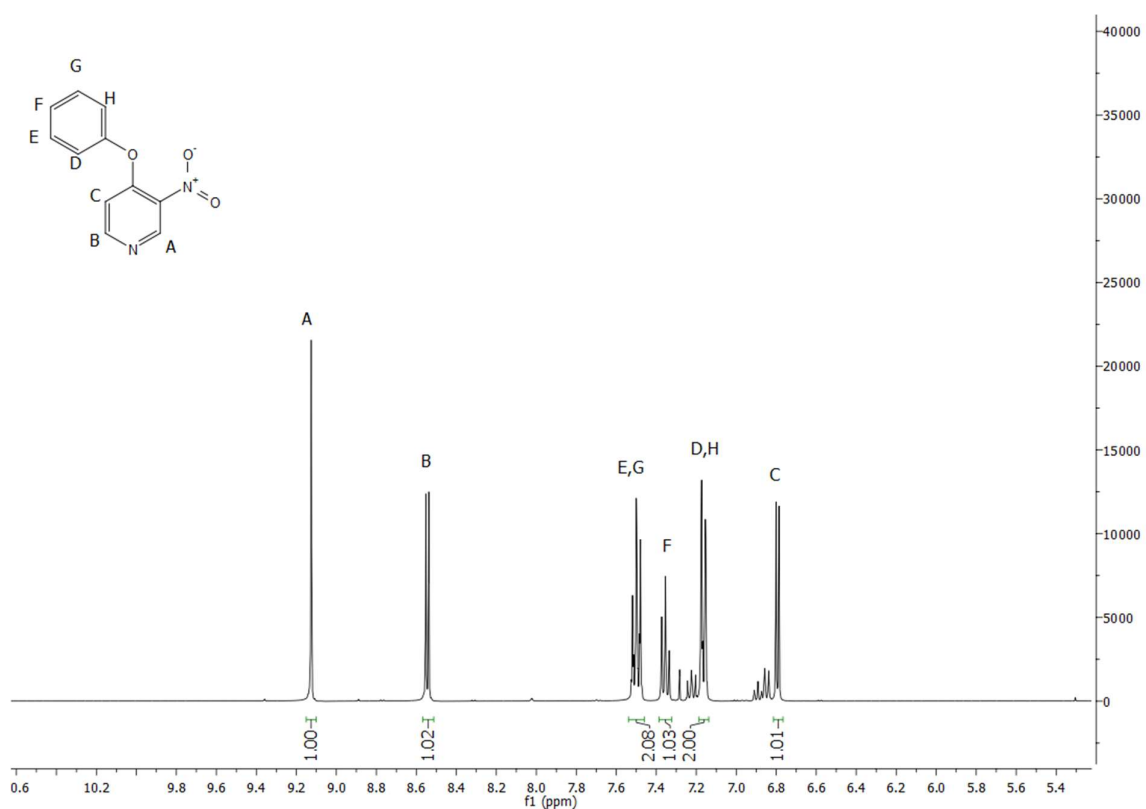

**Figure S1.** <sup>1</sup>H-NMR spectrum recorded in CDCl<sub>3</sub> and at 400 MHz for 3-nitro-4-phenoxy pyridine (1).

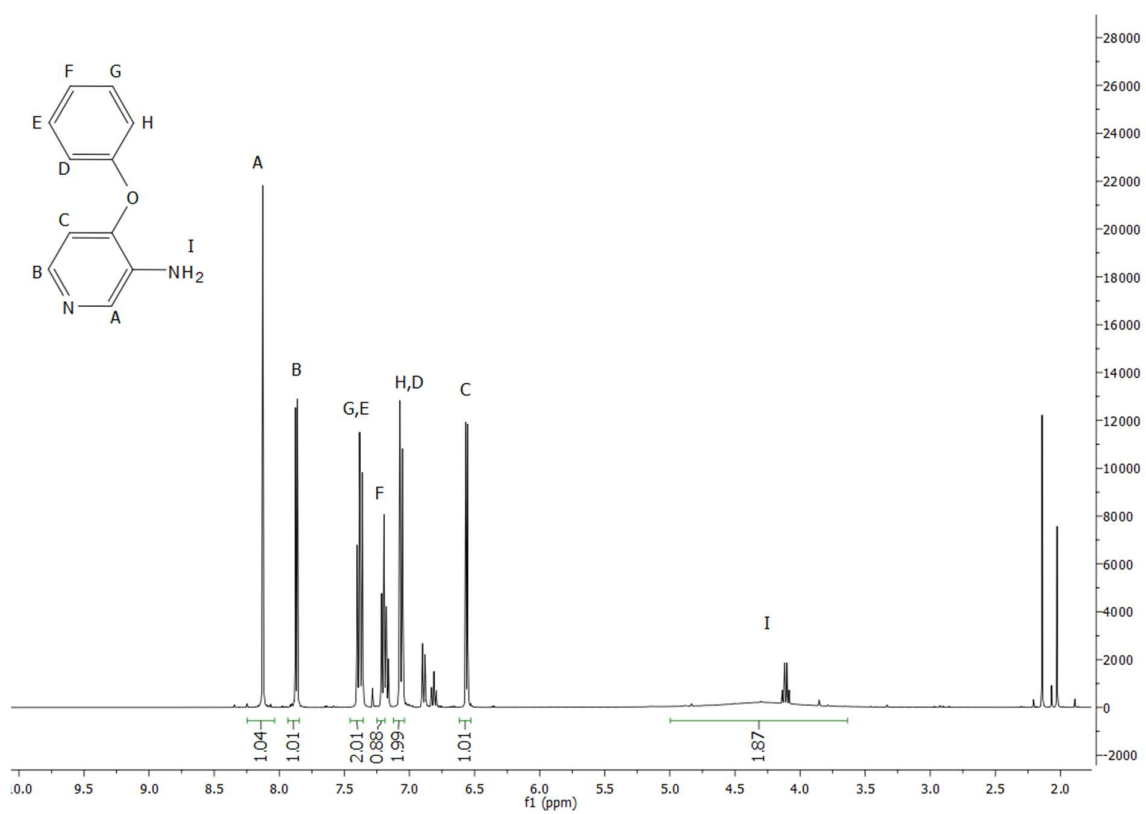

**Figure S2.**  $^1\text{H}$ -NMR spectrum recorded in  $\text{CDCl}_3$  and at 400 MHz for 4-phenoxy-3-pyridinamine (2).

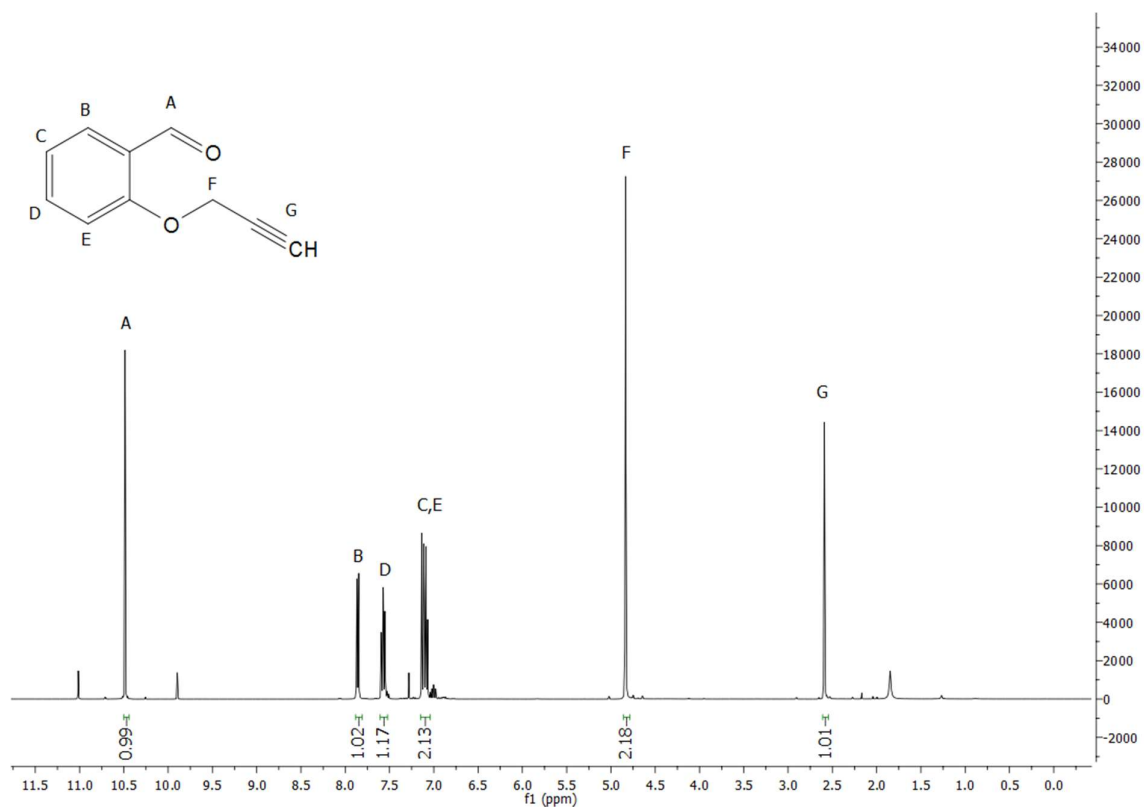

**Figure S3.**  $^1\text{H}$ -NMR spectrum recorded in  $\text{CDCl}_3$  and at 400 MHz for 2-(prop-2-yn-1-yloxy)benzaldehyde (3).

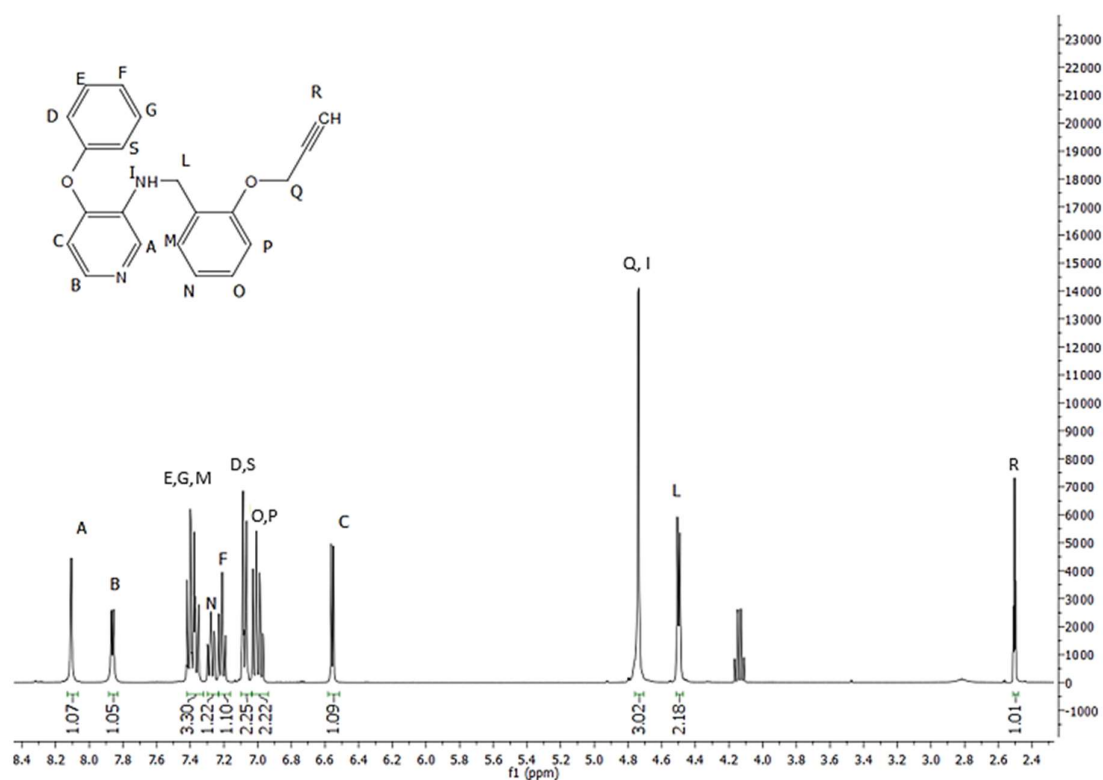

**Figure S4.**  $^1\text{H}$ -NMR spectrum recorded in  $\text{CDCl}_3$  at 400 MHz for 4-phenoxy-N-(2-(prop-2-yn-1-yloxy)benzyl)pyridin-3-amine (5).

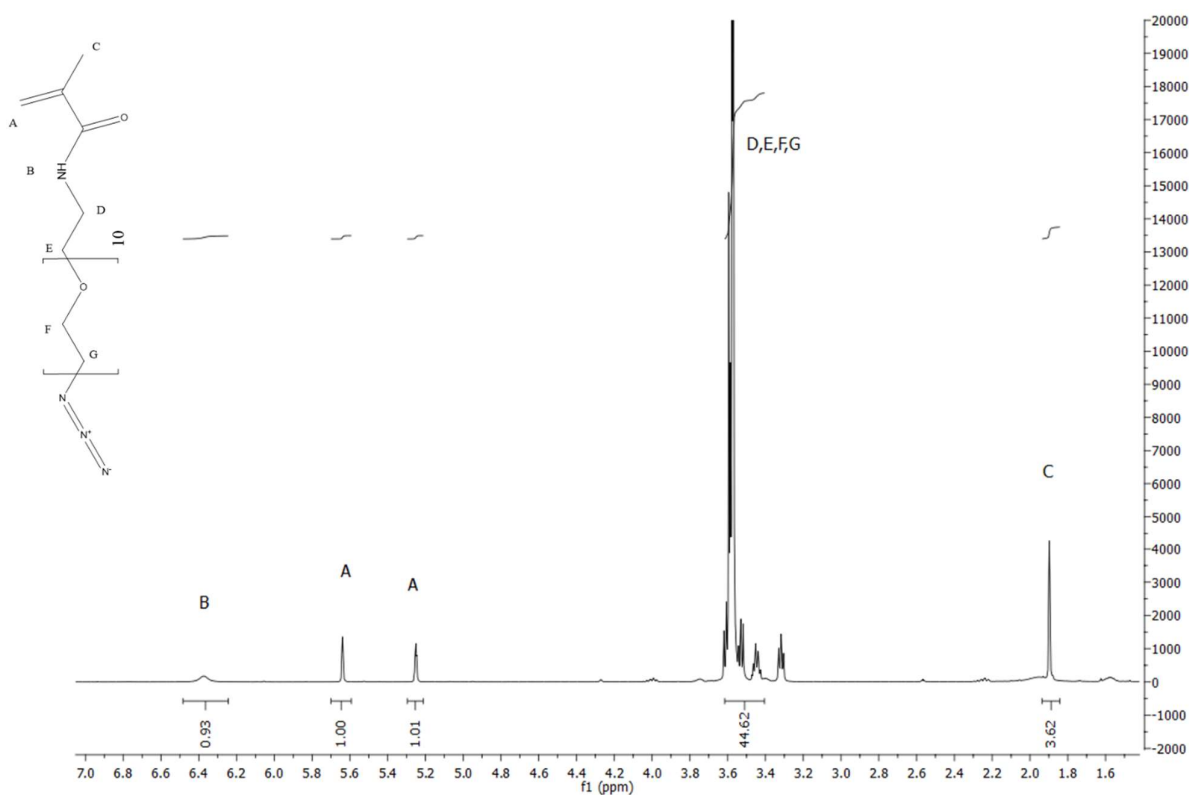

**Figure S5.**  $^1\text{H}$ -NMR spectrum recorded in  $\text{CDCl}_3$  and at 400 MHz for N-(2-(2-azidoethoxy)ethyl)methacrylamide.

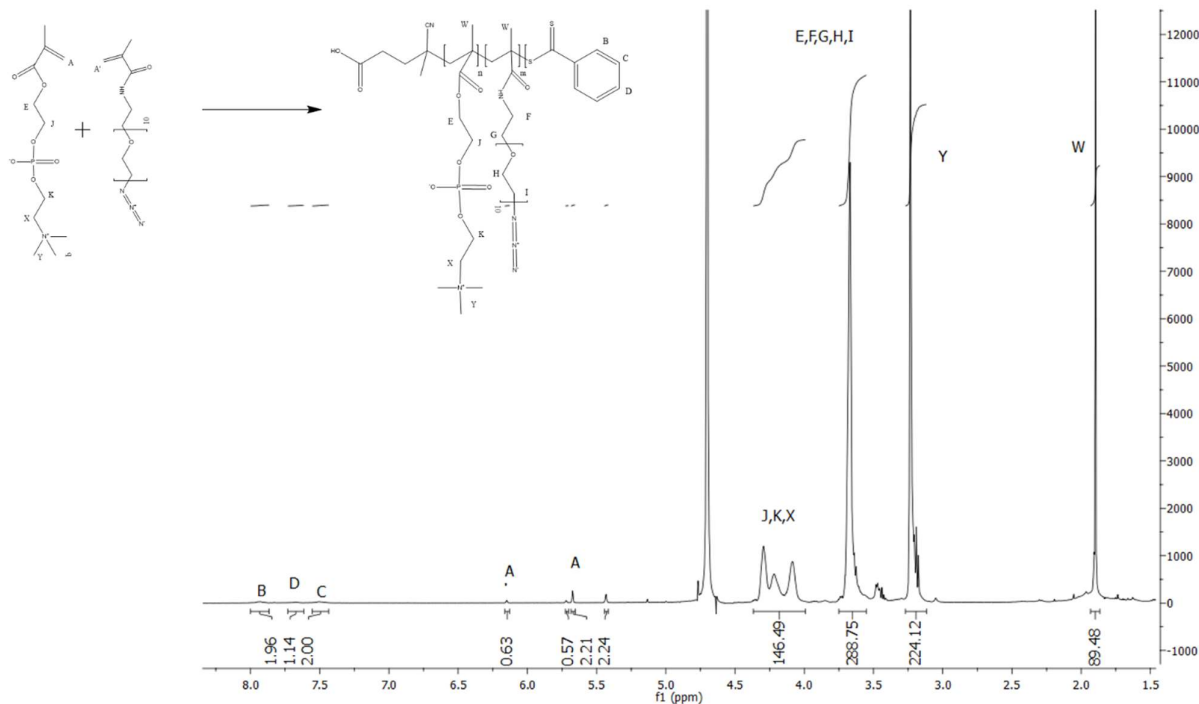

**Figure S6.**  $^1\text{H}$ -NMR spectrum recorded in  $\text{CDCl}_3$  and at 400 MHz for nMPC-m(MePEG- $\text{N}_3$ ) with  $n = 25$  and  $m = 6$ .

The DP ( $n$ ) of MPC and ( $m$ ) of MePEG- $\text{N}_3$  in the macro RAFT agents nMPC-mMe-PEG- $\text{N}_3$  can be calculated as described in equations S1–S2:

$$n = \frac{[J,K,X]}{3 \times C} \times \chi_{\text{MPC}} \quad (\text{S1})$$

$$m = \frac{[E,F,G,H,I] - 2 \times n}{22 \times C} \times \chi_{\text{PEGN}_3} \quad (\text{S2})$$

The peak C that belongs to CPA, was chosen as reference and its area was set equal to 2. To compute the DP, peaks J, K, X were employed as they belong to the 6 H of both the monomeric and polymerized MPC.

The conversion of MPC and MePEG- $\text{N}_3$  ( $\chi_{\text{MPC}}$  and  $\chi_{\text{PEGN}_3}$ , respectively), were instead calculated according to equations S3–S4:

$$X_{\text{MPC}} = 1 - \frac{2 \times A}{J,K,X} \quad (\text{S3})$$

$$X_{\text{PEGN}_3} = 1 - \frac{2 \times A'}{[E,F,G,H,I] - 2 \times n} \quad (\text{S4})$$

To calculate the monomer conversion, for the MPC the peak of one of the hydrogen atoms of the double bond (*A*), only present on the unreacted monomer, was compared to the peaks *J,X,K* corresponding to two hydrogen atoms each, referred to the converted polymer and unreacted monomer. For the MePEG-N<sub>3</sub> at the peak of [*E,F,G,H,I*] was subtracted the value of the peak of MPC corresponding to 2 hydrogens per unit of MPC and evaluated with the peak *A'*.

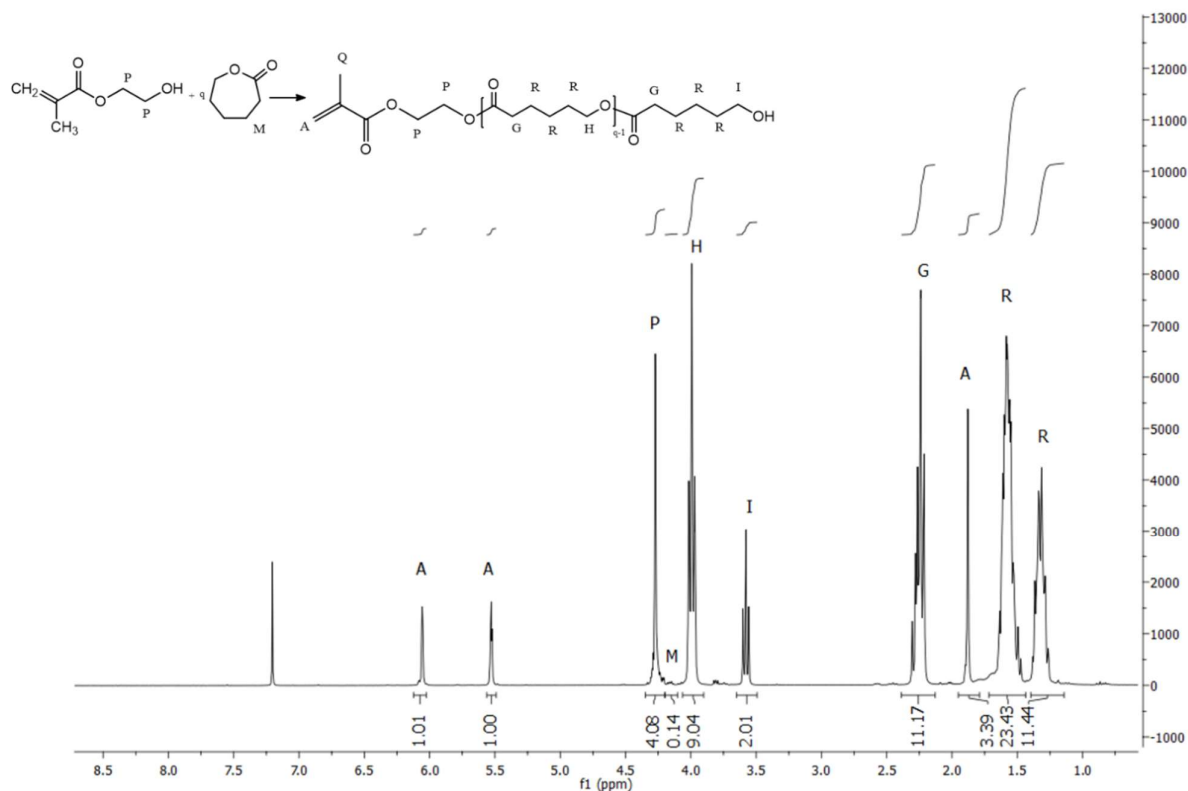

**Figure S7.** Representative <sup>1</sup>H-NMR spectrum of HEMA-CL<sub>q</sub> macromonomer with *q* = 5.

The DP (*q*) of HEMA-CL<sub>q</sub> is calculated as described in equation S5:

$$q = \frac{2(H + I)}{P} \quad (\text{S5})$$

The peaks *I* and *H*, represent respectively the two hydrogen atoms adjacent to the chain-end hydroxyl group and to the ester group, while *P* refers to the 4 protons of the HEMA used as initiator.

The conversion  $X_{CL}$ , was calculated according to equation S6:

$$X_{CL} = \frac{H + I}{H + I + M} \quad (\text{S6})$$

The peak *M* of the two hydrogens adjacent to the ester group of the monomeric CL was compared to the peaks *H* and *I*, of the two hydrogen atoms adjacent to the chain-end hydroxyl group and to the ester group of the polymerized CL, respectively.

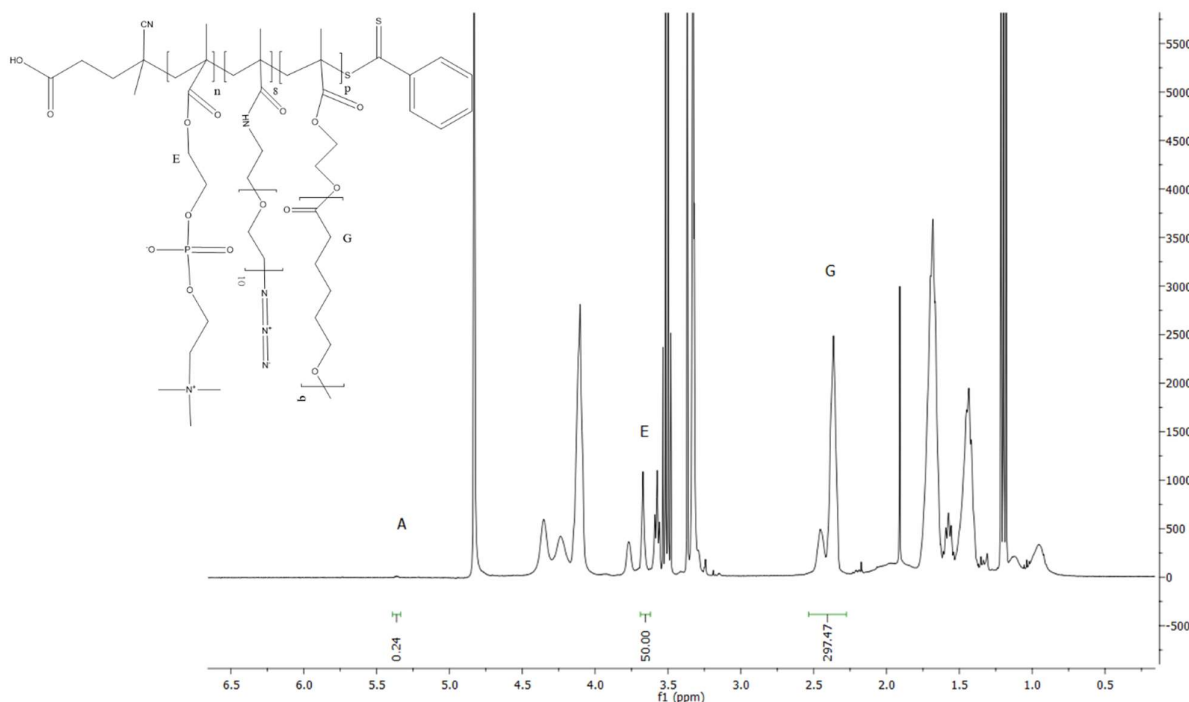

**Figure S8.**  $^1\text{H}$ -NMR spectrum recorded in  $\text{CDCl}_3$  and at 400 MHz for  $n\text{MPC-mMePEG-N}_3\text{-pCL5}$  with  $n = 25$ ,  $m = 6$ , and  $p = 30$ .

The peak *E* corresponding to the two hydrogen atoms present only in MPC was chosen as a reference and set equal to 50 (2 hydrogen atoms of the methylene group multiplied by 25 units of MPC).

The DP of HEMA-CL5 (*p*) can be calculated as described in equation S7:

$$p = \frac{n \times G}{5 \times E} \quad (\text{S7})$$

The peak *G* refers to the two hydrogen atoms present in both reacted and unreacted macromonomer units, while 5 is the number of repeating caprolactone units in the macromonomer.

The macromonomer conversion  $\chi_{\text{HEMA-CL5}}$  is determined according to equation S8:

$$\chi_{\text{HEMA-CL5}} = 1 - \frac{2 \times 5 \times A}{G} \quad (\text{S8})$$

The peak *A*, corresponding to one of the two hydrogen atoms of the lipophilic monomer double bond and the peak *G* were weighted on their number of hydrogens (2 H per 5 repeating units), and the final product was subtracted from 1.

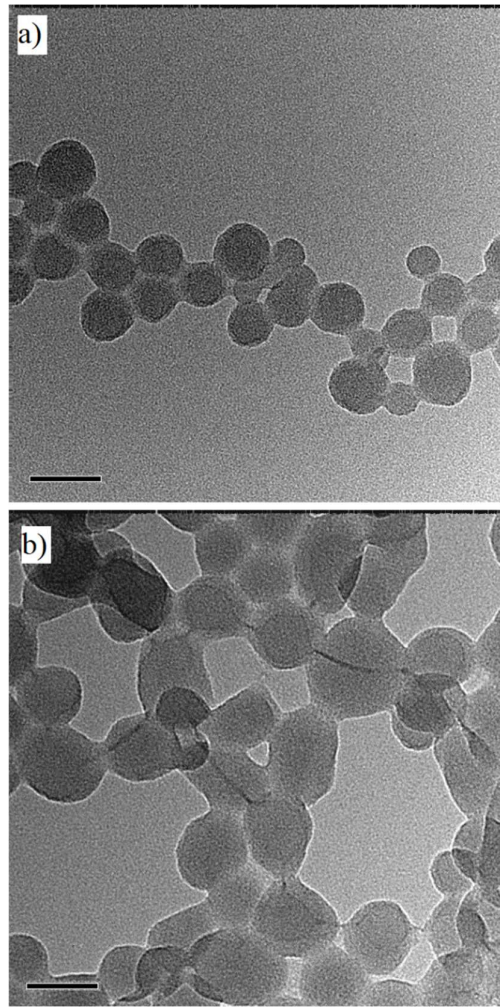

**Figure S9.** TEM micrographs for: (a) 6\_30 (entry 7 in Table 2) and (b) 6PBR30 (entry 4 in Table 2). Scale bar: 100 nm.

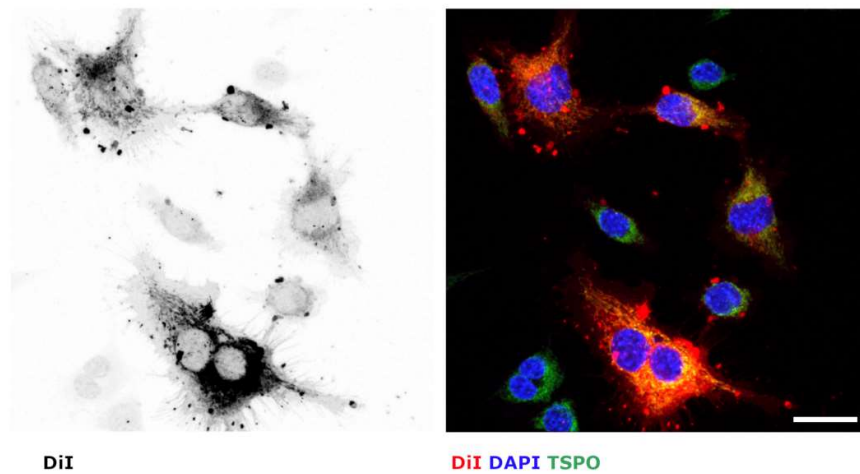

**Figure S10.** Laser scanning confocal microphotographs showing the distribution of DiI signal in BV2 clone#4 TSPO cells exposed to unfiltered DiI 50 ng/ml for 4h. Nuclei are stained with DAPI. Scale bar = 25  $\mu$ m. The single channel showing DiI signal has been inverted to better highlight the distribution of the dye into the cell membranes.
